# Supplementary material for: Preparation of a metal phosphide derived from the dual-ligand NiFe-MOF and its boosted activity toward the electrolysis of water
Source: Royal Society of Chemistry journal article supplement (doi:10.1039/d3nj04117d), 2023-01-01
Supplement: d3nj04117d1.pdf [file d3nj04117d1.pdf]

## Supporting Information

### Preparation of metal phosphide derived from dual-ligand NiFe-MOF and its boosting activity toward electrolysis of water

Qing Guo<sup>#</sup>, Lin Wu<sup>#</sup>, Jie Feng, Zhijuan Zou, Chunmei Zeng\* and Kunpeng Song\*

<sup>1</sup>*College of Chemistry and Chemical Engineering, China West Normal University, Shida Road, Nanchong, 637009, China.*

<sup>2</sup>*Chemical Synthesis and Pollution Control Key Laboratory of Sichuan Province, China West Normal University, Nanchong, 637009, China.*

\* Corresponding author.

E-mail address: [song19880405@126.com](mailto:song19880405@126.com); [melzeng@163.com](mailto:melzeng@163.com)

<sup>#</sup>*The authors contribute equally to this paper.*

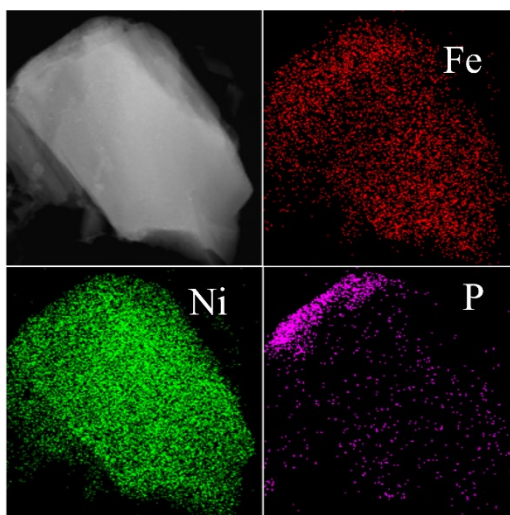

Fig. S1 elemental mapping image of P-FeNi

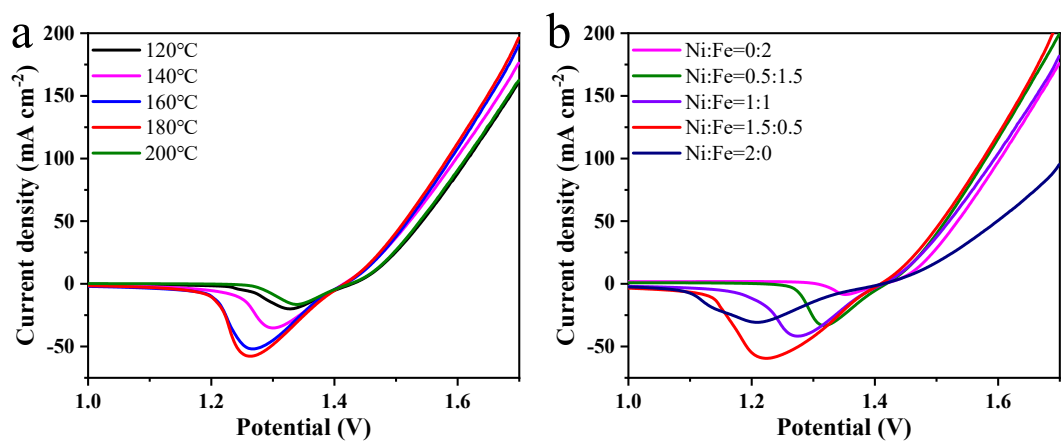

Fig. S2 LSV curves of different hydrothermal temperature (a) and different nickel-iron ratio (b) of P-FeNi@NFF.

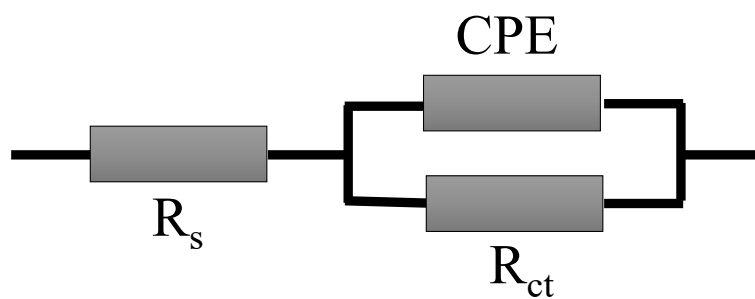

Fig. S3 The equivalent circuit model of EIS Nyquist diagram is fitted.  $R_s$ : solution resistance;  $R_{ct}$ : charge transfer resistance; CPE: Other resistors.

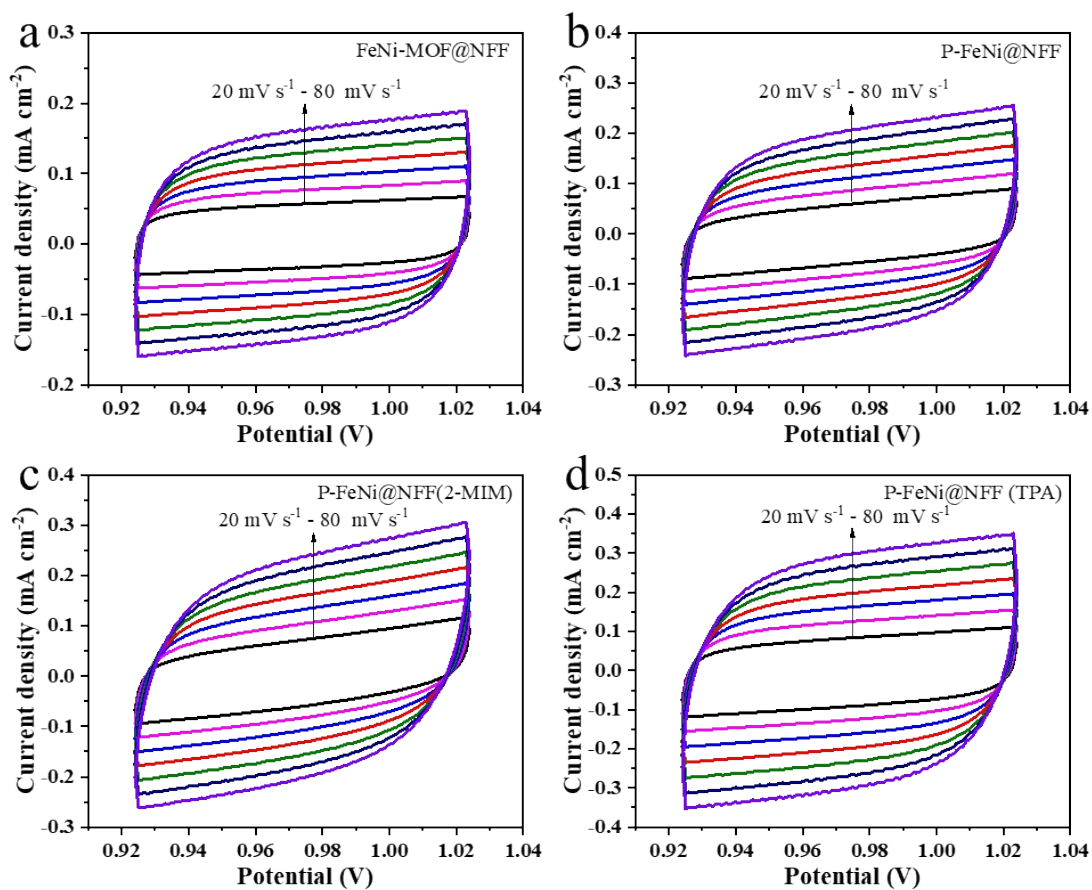

Fig. S4 CV diagrams of FeNi-MOF@NFF (a), P-FeNi@NFF (b), P-FeNi@NFF(2-MIM) (c), and P-FeNi@NFF(TPA) (d) at different sweep rates of 20-80 mV s<sup>-1</sup>.

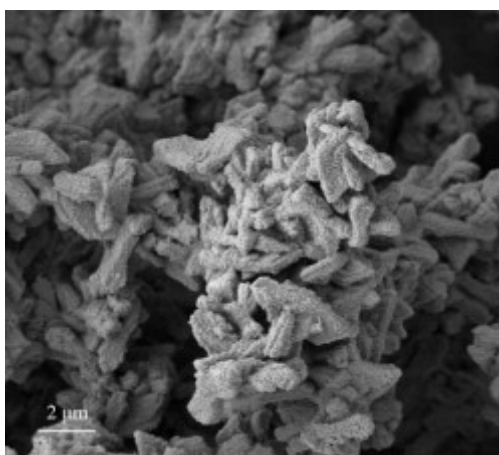

Fig. S5 SEM of P-FeNi@NFF after stability test

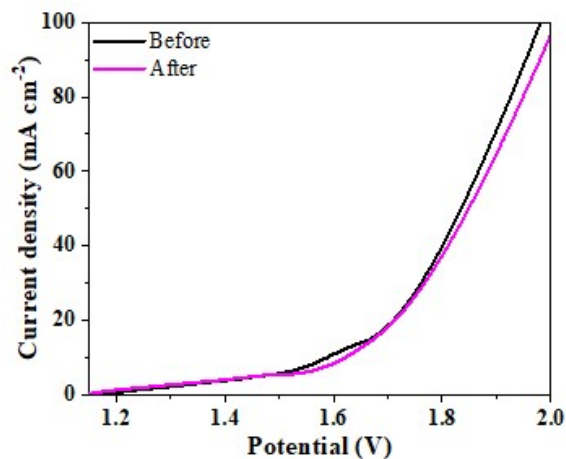

Fig. S6 LSV comparison of P-FeNi@NFF before and after stability test

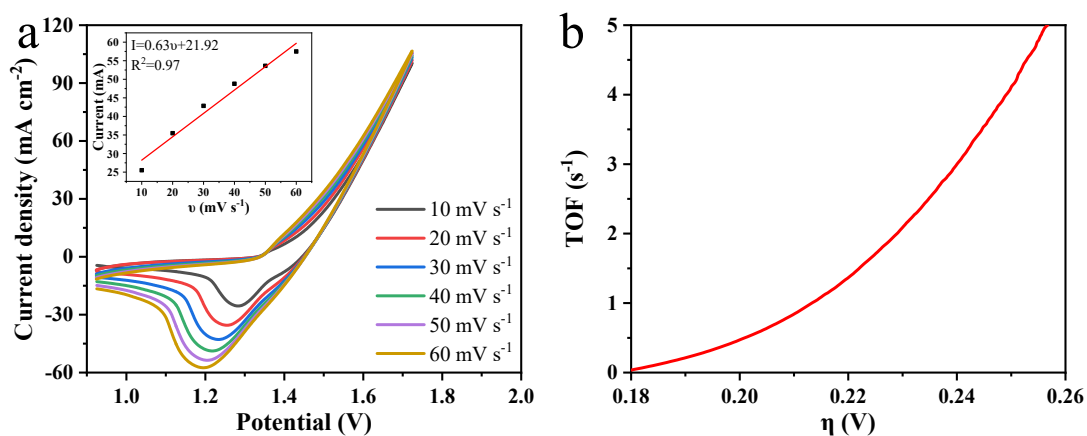

Fig. S7 CV curves of P-FeNi@NFF as the scanning rate increases from  $10 \text{ mV s}^{-1}$  to  $80 \text{ mV s}^{-1}$  (Inset: linear relationship between peak oxidation current and scanning rate). (d) The relationship between TOF of P-FeNi@NFF and overpotential.

## Tables

Table S1 Performance comparison of materials for OER

| Catalysts         | Overpotential/mV           |                             | $Z/\Omega$ |          |
|-------------------|----------------------------|-----------------------------|------------|----------|
|                   | at $10 \text{ mA cm}^{-2}$ | at $100 \text{ mA cm}^{-2}$ | $R_s$      | $R_{ct}$ |
| FeNi-MOF@NFF      | 202                        | 282                         | 3.75       | 6.91     |
| P-FeNi@NFF        | 194                        | 241                         | 2.07       | 0.62     |
| P-FeNi@NFF(2-MIM) | 232                        | 287                         | 2.04       | 1.19     |
| P-FeNi@NFF(TPA)   | 201                        | 251                         | 2.25       | 0.64     |

Table S2 Performance comparison of self-supported catalysts for OWS

| Electrolytic cell                    | Cell voltage/at 10 mA cm <sup>-2</sup> | Ref.      |
|--------------------------------------|----------------------------------------|-----------|
| P-FeNi@NFF    P-FeNi@NFF             | 1.59 V                                 | This work |
| Fe-MOF/Au-8/FF    Fe-MOF/Au-8/FF     | 1.61 V                                 | [1]       |
| NiSP/NF    NiSP/NF                   | 1.70 V                                 | [2]       |
| NiCoP/NF    NiCoP/NF                 | 1.60 V                                 | [3]       |
| NiFe-MOF-74/NF    NiFe-MOF-74/NF     | 1.58 V                                 | [4]       |
| Fe,Rh-Ni2P/NF    Fe,Rh-Ni2P/NF       | 1.62 V                                 | [5]       |
| DLC FCP@NG    DLC FCP@NG             | 1.63 V                                 | [6]       |
| CoNi2S4/Ni3S2@NF    CoNi2S4/Ni3S2@NF | 1.65 V                                 | [7]       |

## References

- [1] Xu, Y., Xie, M., Li, X., Shao, F., Li, S., Li, S., Xu, Y., Chen, J., Zeng, F., Jiao, Y., Regulating the electronic structure of Fe-based metal organic frameworks by electrodeposition of Au nanoparticles for electrochemical overall water splitting, *Journal of Colloid and Interface Science*. **2022**, 626, 426-434.
- [2] Marquez-Montes, R. A., Kawashima, K., Son, Y. J., Weeks, J. A., Sun, H. H., Celio, H., Ramos-Sanchez, V. I. H., Abcef, A. C. B. M., Mass transport-enhanced electrodeposition of Ni-S-P-O films on nickel foam for electrochemical water splitting, *Journal of Materials Chemistry A*. **2021**, 9, 7736-7749.
- [3] Wang, D., Zhang, Y., Fei, T., Mao, C., Song, Y., Zhou, Y., Dong, G., NiCoP/NF 1D/2D biomimetic architecture for markedly enhanced overall water splitting, *Chemelectrochem*. **2021**, 8, 3064-3072.
- [4] Chen, C., Suo, N., Han, X., He, X., Dou, Z., Lin, Z., Cui, L., Tuning the morphology and electron structure of metal-organic framework-74 as bifunctional electrocatalyst for OER and HER using bimetallic collaboration strategy, *Journal of Alloys and Compounds*. **2021**, 865, 158795-158803.
- [5] Chen, M., Duan, J., Feng, J., Mei, L., Jiao, Y., Zhang, L., Wang, A., Iron, rhodium-codoped Ni<sub>2</sub>P nanosheets arrays supported on nickel foam as an efficient bifunctional electrocatalyst for overall water splitting, *Journal of Colloid and Interface Science*. **2022**, 605, 888-896.
- [6] Lu, Y., Chen, Y., Srinivas, K., Su, Z., Wang, X., Wang, B., Yang, D., Employing dual-ligand coordination compound to construct nanorod-like Bi-metallic (Fe, Co)P decorated with nitrogen-doped graphene for electrocatalytic overall water splitting, *Electrochimica Acta*. **2020**, 350, 136338-136348.
- [7] Dai, W., Ren, K., Zhu, Y., Pan, Y., Yu, J., Lu, T., Flower-like CoNi<sub>2</sub>S<sub>4</sub>/Ni<sub>3</sub>S<sub>2</sub> nanosheet clusters on nickel foam as bifunctional electrocatalyst for overall water splitting, *Journal of Alloys and Compounds*. **2020**, 844, 156252-156261.
